# Supplementary material for: Measuring responsiveness and mistreatment in maternity care in sub-Saharan Africa: a questionnaire validation and development of a score
Source: Research Square preprint supplement (doi:10.21203/rs.3.rs-3671922/v1), 2023-12-06
Supplement: Supplementary file 1 [file 043d71aa320f627d64a33f52.docx]

## Additional File 3

## Dates of data collection rounds.

| Country | Round 1 - baseline | Round 2 | Round 3 |
| --- | --- | --- | --- |
| Benin | 5th December 2021 – 24th January 2022 | 17th June 2022 – 21st July 2022 | 13th December 2022 – 31st January 2023 |
| Malawi | 3rd December 2021 – 22nd December 2021 | 13th August 2022 – 9th September 2022 | 13th February 2023 – 5th March 2023 |
| Tanzania | 9th December 2021 – 22nd December 2021 | 18th July 2022 – 6th August 2022 | 8th March 2023 – 31st March 2023 |
| Uganda | 28th January 2022 –16th April 2022 | 8th June 2022 – 11th August 2022 | 17th December 2022 – 7th April 2023 |
